# Supplementary material
Source: PubMed Central journal article supplement (PMC5427265)
Supplement: 10.1074_M117.780734_jbc.M117.780734-1.pdf [file 10.1074_M117.780734_jbc.M117.780734-1.pdf]

## Supplemental Materials

### **Title: The Unique Prodomain of T-cadherin Plays a Key Role in Adiponectin Binding with the Essential Extracellular Cadherin Repeats 1 and 2.**

**Authors:** Shiro Fukuda,<sup>1</sup> Shunbun Kita,<sup>1,2,\*</sup> Yoshinari Obata,<sup>1</sup> Yuya Fujishima,<sup>1</sup> Hirofumi Nagao,<sup>1</sup> Shigeki Masuda,<sup>1</sup> Yoshimitsu Tanaka,<sup>1</sup> Hitoshi Nishizawa,<sup>1</sup> Tohru Funahashi,<sup>1,2</sup> Junichi Takagi,<sup>3</sup> Norikazu Maeda,<sup>1,2</sup> and Iichiro Shimomura<sup>1</sup>

**Affiliations:** <sup>1</sup>Department of Metabolic Medicine, Graduate School of Medicine, Osaka University, Osaka, Japan. <sup>2</sup>Department of Metabolism and Atherosclerosis, Graduate School of Medicine, Osaka University, Osaka, Japan. <sup>3</sup>Institute for Protein Research, Osaka University, Suita, Osaka, Japan.

**\*Corresponding author:** Shunbun Kita Department of Metabolic Medicine, Graduate School of Medicine, Osaka University, 2-2 Suita, Osaka 565-0871, Japan. TEL; +81-6-6879-3732. E-mail; shunkita@endmet.med.osaka-u.ac.jp

### **Table of Contents**

---

|                                                               |     |
|---------------------------------------------------------------|-----|
| <b>Figure S1.</b> Protein G-based T-cadFc capture assay. .... | S-2 |
|---------------------------------------------------------------|-----|

---

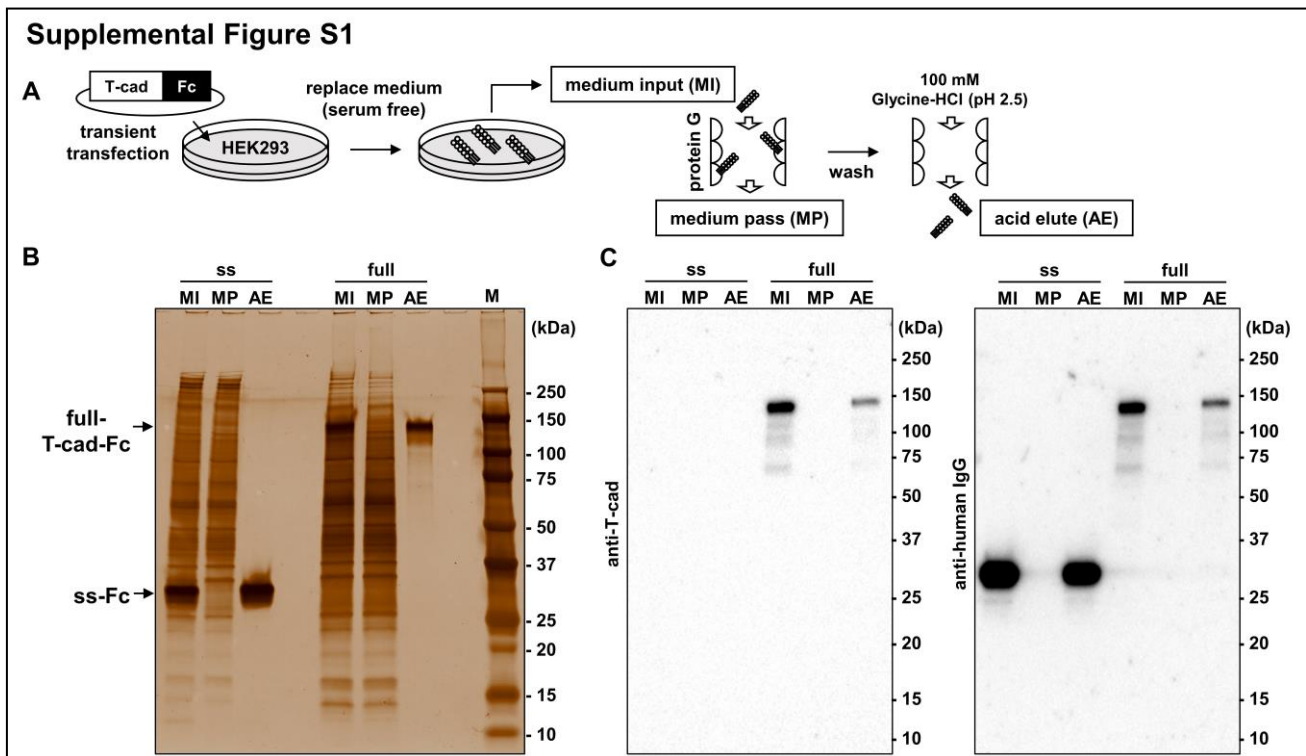

**Supplemental Figure S1: Protein G-based T-cadFc capture assay.**

- A)** Schematic illustration of Protein G-based T-cadFc capture assay. One milliliter of Serum-free DMEM containing Fc-fusion protein expressed by HEK293 (MI; medium input) was incubated with Protein G agarose for 1 hour. Following collection of the supernatant (MP; medium pass) and extensive wash, the resin was incubated with 1 mL of 100 mM Glycine-HCl (pH 2.5) for 5 minutes. The elution (AE; acid elute) was collected and immediately neutralized by 2 M Tris-HCl (pH 9.0).
- B)** Silver staining analysis of each fraction (MI, MP, and AE) for ss-Fc and full-T-cadFc. The same amount (50  $\mu$ L) of each sample was concentrated with trichloroacetic acid / acetone precipitation and applied to the gel. M; marker.
- C)** Immunoblots for T-cadherin (left) and human-IgG (right) of each fraction. The same amount (5  $\mu$ L) of each sample were loaded.
